# Supplementary material for: The Impact of Environmental Habitats and Diets on the Gut Microbiota Diversity of True Bugs (Hemiptera: Heteroptera)
Source: Biology (Basel). 2022 Jul 11;11(7):1039. doi: 10.3390/biology11071039 (PMC9312191; doi:10.3390/biology11071039)
Supplement: Supplementary file 1 [file biology-11-01039-s001.zip]

Archive with 6 entries (6 files):
- Supplementary Figure S1.The representative bacterial genera associated with different heteropteran families identified based on linear discriminant analysis effect size.pdf
- Supplementary Table S1. Collection information for true bugs used in this study.xlsx
- Supplementary Table S2. The obtained reads numbers after removing singletons, chimeric sequences.xlsx
- Supplementary Table S3. Relative abundance of dominant bacterial phyla and genera across different species.xlsx
- Supplementary Table S4. The number of ASVs assigned to the taxonomic scale of bacterial genus across the 30 species of true bugs.xlsx
- Supplementary Table S5. The detail of standard curve and Cq values for each gut..xlsx
