# Supplementary material for: The Impact of Environmental Habitats and Diets on the Gut Microbiota Diversity of True Bugs (Hemiptera: Heteroptera)
Source: Biology (Basel). 2022 Jul 11;11(7):1039. doi: 10.3390/biology11071039 (PMC9312191; doi:10.3390/biology11071039)
Supplement: Supplementary file 1 [file biology-11-01039-s001.zip › Supplementary Table S1. Collection information for true bugs used in this study.xlsx]

## Sheet: Table S1
Table S1. Collection information for true bugs used in this study
Infraorder	Superfamily	Family	Species	Collection sites	Collection dates	Feeding habits	Habitats	Samples
Nepomorpha	Notonectoidea	Notonectidae	Anisops sp.	Baiwangshan Forest Park, Haidian District, Beijing, China	2021-11-25	Carnivorous	Aquatic	8
			Enithares chinensis	Jinuo Mountain, Jinghong, Yunnan, China	2021-05-07	Carnivorous	Aquatic	6
	Nepoidea	Belostomatidae	Appasus japonicus	Jingguan Town, Xichuan County, Nanyang, Henan, China	2021-04-04	Carnivorous	Aquatic	4
			Diplonychus rusticus	Jingguan Town, Xichuan County, Nanyang, Henan, China	2021-04-04	Carnivorous	Aquatic	4
			Lethocerus deyrollei	Dalaihubu Town, Ejin Banner, Inner Mongolia, China	2021-05-26	Carnivorous	Aquatic	4
		Nepidae	Ranatra chinensis	Baiwangshan Forest Park, Haidian District, Beijing, China	2021-09-08	Carnivorous	Aquatic	3
			Ranatra lansburyi	Jinuo Mountain, Jinghong, Yunnan, China	2021-05-07	Carnivorous	Aquatic	5
			Laccotrephes robustus	Baiwangshan Forest Park, Haidian District, Beijing, China	2021-09-08	Carnivorous	Aquatic	3
Cimicomorpha	Reduvioidea	Reduviidae	Platymeris biguttatus	Reared in the laboratory	2019-07-01	Carnivorous	Terrestrial	3
			Sycanus croceovittatus	Reared in the laboratory	2020-09-01	Carnivorous	Terrestrial	3
			Sycanus falleni	Jinuo Mountain, Jinghong, Yunnan, China	2021-05-07	Carnivorous	Terrestrial	4
			Sycanus szechuanus	Reared in the laboratory	2020-09-21	Carnivorous	Terrestrial	4
			Pahabengkakia piliceps	Jinuo Mountain, Jinghong, Yunnan, China	2021-05-08	Carnivorous	Terrestrial	6
			Sphedanolestes impressicollis	Yinshan Forest Park, Jinxiu, Guangxi, China	2020-06-20	Carnivorous	Terrestrial	3
			Rhynocoris fuscipes	Reared in the laboratory	2020-09-03	Carnivorous	Terrestrial	3
	Naboidea	Nabidae	Nabis sp.	Yinshan Forest Park, Jinxiu, Guangxi, China	2020-06-20	Carnivorous	Terrestrial	2
			Nabis sinoferus	China Agricultural University, Haidian District, Beijing, China	2021-08-10	Carnivorous	Terrestrial	6
			Stenonabis fujianus	Nanling National Forest Park, Shaoguan, Guangdong, China	2020-07-22	Carnivorous	Terrestrial	3
	Miroidea	Miridae	Deraeocoris sp.	Yinshan Forest Park, Jinxiu, Guangxi, China	2020-06-20	Carnivorous	Terrestrial	2
			Helopeltis sp.	Yinshan Forest Park, Jinxiu, Guangxi, China	2020-06-20	Herbivorous	Terrestrial	2
			Adelphocoris lineolatus	Baiwangshan Forest Park, Haidian District, Beijing, China	2021-06-25	Herbivorous	Terrestrial	6
			Apolygus lucorum	Reared in the laboratory	2020-11-10	Herbivorous	Terrestrial	8
			Stenodema sp.	Nanling National Forest Park, Shaoguan, Guangdong, China	2020-07-22	Herbivorous	Terrestrial	5
Pentatomomorpha	Aradoidea	Aradidae	Aradus hieroglyphicus	China Agricultural University, Haidian District, Beijing, China	2021-11-08	Mycophagous	Terrestrial	10
			Neuroctenus taiwanicus	Mengyuan Paradise, Mengla, Yunnan, China	2021-05-12	Mycophagous	Terrestrial	15
			Mezira yunnana	Qinglong Mountian, Nanjing, China	2021-08-15	Mycophagous	Terrestrial	8
	Pyrrhocoroidea	Pyrrhocoridae	Dindymus rubiginosus	Xishuangbanna Tropical Botanical Garden, Menglun, Yunnan, China	2021-05-10	Carnivorous	Terrestrial	4
			Dysdercus cingulatus	Xishuangbanna Tropical Botanical Garden, Menglun, Yunnan, China	2021-05-10	Herbivorous	Terrestrial	2
			Dysdercus evanescens	Xishuangbanna Tropical Botanical Garden, Menglun, Yunnan, China	2021-05-10	Herbivorous	Terrestrial	3
			Pyrrhocoris tibialis	Baiwangshan Forest Park, Haidian District, Beijing, China	2021-06-25	Herbivorous	Terrestrial	8
