# Supplementary material for: The Impact of Environmental Habitats and Diets on the Gut Microbiota Diversity of True Bugs (Hemiptera: Heteroptera)
Source: Biology (Basel). 2022 Jul 11;11(7):1039. doi: 10.3390/biology11071039 (PMC9312191; doi:10.3390/biology11071039)
Supplement: Supplementary file 1 [file biology-11-01039-s001.zip › Supplementary Table S2. The obtained reads numbers after removing singletons, chimeric sequences.xlsx]

## Sheet: Table S2
Table S2. The obtained reads numbers after removing singletons, chimeric sequences.
Species	Input	Filtered	Percentage of input passed filter	Denoised	Non-chimeric	Percentage of input non-chimeric
Anisops sp.	42866	41135	95.96	40799	38260	89.25
Enithares chinensis	83361	79857	95.8	79768	79721	95.63
Appasus japonicus	62469	60227	96.41	59736	59406	95.1
Diplonychus rusticus	46264	42907	92.74	42631	42406	91.66
Lethocerus deyrollei	69038	64571	93.53	64069	61729	89.41
Ranatra chinensis	39196	35299	90.06	34902	34722	88.59
Ranatra lansburyi	41849	39575	94.57	39387	39228	93.74
Laccotrephes robustus	39837	35858	90.01	34564	31815	79.86
Platymeris biguttatus	35850	33809	94.31	33686	33339	93
Sycanus croceovittatus	28980	26187	90.36	26177	26045	89.87
Sycanus falleni	57236	55091	96.25	55062	55062	96.2
Sycanus szechuanus	31843	30280	95.09	30259	30254	95.01
Pahabengkakia piliceps	31058	28337	91.24	28250	28196	90.78
Sphedanolestes impressicollis	77454	73843	95.34	73453	60757	78.44
Rhynocoris fuscipes	37493	34749	92.68	34491	32821	87.54
Nabis sp.	43458	40238	92.59	40012	39999	92.04
Nabis sinoferus	29616	26610	89.85	26194	22615	76.36
Stenonabis fujianus	33846	30225	89.3	29723	28888	85.35
Deraeocoris sp.	31777	30330	95.45	30290	30255	95.21
Helopeltis sp.	37130	34667	93.37	34443	34144	91.96
Adelphocoris lineolatus	109540	104700	95.58	104545	104464	95.37
Apolygus lucorum	21075	19688	93.42	19533	16566	78.6
Stenodema sp.	34677	33019	95.22	32981	32981	95.11
Aradus hieroglyphicus	38263	36081	94.3	36062	36062	94.25
Neuroctenus taiwanicus	41611	39886	95.85	39693	39653	95.29
Mezira yunnana	48168	46058	95.62	45508	44749	92.9
Dindymus rubiginosus	45070	42967	95.33	42271	37108	82.33
Dysdercus cingulatus	42603	40436	94.91	40087	39567	92.87
Dysdercus evanescens	45062	43565	96.68	43478	43407	96.33
Pyrrhocoris tibialis	62249	60090	96.53	59780	55443	89.07
