# Supplementary material for: The Impact of Environmental Habitats and Diets on the Gut Microbiota Diversity of True Bugs (Hemiptera: Heteroptera)
Source: Biology (Basel). 2022 Jul 11;11(7):1039. doi: 10.3390/biology11071039 (PMC9312191; doi:10.3390/biology11071039)
Supplement: Supplementary file 1 [file biology-11-01039-s001.zip › Supplementary Table S3. Relative abundance of dominant bacterial phyla and genera across different species.xlsx]

## Sheet: Bacterial Phylum Frequncy
Infraorder	Family	Species	Proteobacteria	Firmicutes	Bacteroidota	Actinobacteriota	Desulfobacterota	Patescibacteria	Acidobacteriota	Deinococcota	Chloroflexi
Nepomorpha	Notonectidae	Anisops sp.	4374	5219	1375	1371	73	0	506	0	253
		Enithares chinensis	13249	187	69	233	0	87	8	51	7
	Belostomatidae	Appasus japonicus	2106	3699	5160	104	2680	21	9	0	14
		Diplonychus rusticus	7361	3506	2172	147	543	138	1	3	3
		Lethocerus deyrollei	7284	1507	3836	627	46	440	1	7	1
	Nepidae	Ranatra chinensis	13251	278	12	117	14	4	0	0	7
		Ranatra lansburyi	8142	2656	1	0	3198	0	0	0	0
		Laccotrephes robustus	1630	8409	357	120	2542	885	0	0	7
Cimicomorpha	Reduviidae	Platymeris biguttatus	125	13657	1	213	0	0	0	0	0
		Sycanus croceovittatus	3551	10411	0	38	0	0	0	0	0
		Sycanus falleni	368	13044	0	557	0	0	0	0	0
		Sycanus szechuanus	6813	7032	16	137	0	0	0	0	0
		Pahabengkakia piliceps	3126	10838	1	29	0	0	0	0	3
		Sphedanolestes impressicollis	3742	10258	0	0	0	0	0	0	0
		Rhynocoris fuscipes	10897	2763	285	38	0	0	0	0	0
	Nabidae	Nabis sp.	13678	76	26	60	0	2	7	133	2
		Nabis sinoferus	13716	93	14	123	25	3	3	0	9
		Stenonabis fujianus	9408	4489	32	14	0	3	1	10	0
	Miridae	Deraeocoris sp.	13298	168	249	122	0	0	48	14	0
		Helopeltis sp.	13926	25	12	9	0	4	0	0	0
		Adelphocoris lineolatus	13860	21	13	6	0	0	9	5	0
		Apolygus lucorum	13145	761	8	33	0	0	4	10	0
		Stenodema sp.	13500	317	2	123	0	0	0	58	0
Pentatomomorpha	Aradidae	Aradus hieroglyphicus	13248	18	26	705	0	0	0	3	0
		Neuroctenus taiwanicus	13092	97	67	435	0	62	0	9	31
		Mezira yunnana	10785	1447	208	1072	56	16	27	38	17
	Pyrrhocoridae	Dindymus rubiginosus	6823	7050	98	29	0	0	0	0	0
		Dysdercus cingulatus	2472	11201	2	313	0	7	0	0	0
		Dysdercus evanescens	9316	4069	3	612	0	0	0	0	0
		Pyrrhocoris tibialis	4442	7205	7	2319	1	0	4	2	2

## Sheet: Top30 genera
Infraorder	Family	Species	g__Enterococcus	g__Wolbachia	g__Rickettsia	g__Hungatella	g__Cedecea	g__Pantoea	g__Buchnera	g__Proteus	f__Enterobacteriaceae;__	o__Enterobacterales;__;__	g__Spiroplasma	f__Ruminococcaceae;g__uncultured	g__Yokenella	g__Asaia	g__Desulfovibrio	g__Sphingomonas	g__Lactococcus	g__Serratia	g__Commensalibacter	g__Arsenophonus	g__Dysgonomonas	f__Rhizobiaceae;__	g__Phaeovibrio	f__Erwiniaceae;__	g__Hafnia-Obesumbacterium	g__Acinetobacter	g__Citrobacter	g__Candidatus_Soleaferrea	g__Pseudomonas	g__Rhodococcus
Nepomorpha	Notonectidae	Anisops sp.	1138	0	0	0	0	0	0	0	576	101	0	0	0	0	48	0	46	1877	0	0	0	131	0	13	0	3	0	0	89	0
		Enithares chinensis	104	9930	1	0	0	0	0	46	0	280	53	0	0	0	0	323	17	26	0	0	0	0	0	0	0	486	5	0	260	30
	Belostomatidae	Appasus japonicus	1	0	0	0	0	0	0	0	2	21	0	383	0	0	1415	4	1	2	0	1317	2063	0	82	0	0	0	0	1332	21	84
		Diplonychus rusticus	0	0	0	0	23	0	0	0	818	594	10	215	0	0	537	1	599	0	0	108	2016	0	3823	0	0	56	809	1001	22	82
		Lethocerus deyrollei	3	0	0	0	0	126	0	17	125	6	1253	32	0	0	27	23	9	8	0	0	15	35	20	0	3	1693	243	2	314	324
	Nepidae	Ranatra chinensis	0	0	7	0	0	0	0	0	0	5561	210	1	0	4267	0	0	0	0	43	3171	0	0	0	0	0	0	0	0	2	0
		Ranatra lansburyi	1	2433	0	0	0	0	0	0	364	4225	46	2580	0	0	3198	0	0	4	0	0	1	0	0	0	0	2	0	0	0	0
		Laccotrephes robustus	2	0	0	0	0	0	0	0	10	135	3	7385	0	0	2520	0	0	192	0	0	298	0	0	0	0	0	17	0	0	0
Cimicomorpha	Reduviidae	Platymeris biguttatus	7054	0	0	0	0	0	0	3	0	0	5330	0	0	0	0	20	135	31	0	0	0	0	0	0	0	4	0	0	5	0
		Sycanus croceovittatus	10411	0	0	0	0	0	0	0	234	0	0	0	0	0	0	0	0	310	0	0	0	0	0	0	2282	0	0	0	4	0
		Sycanus falleni	12981	0	0	0	0	0	0	1	88	0	0	0	0	0	0	0	0	65	0	0	0	0	0	0	0	0	0	0	7	194
		Sycanus szechuanus	6883	0	0	0	0	0	0	0	0	4	34	0	4472	0	0	0	0	2274	0	0	0	0	0	0	0	0	0	0	210	38
		Pahabengkakia piliceps	10766	0	0	0	0	0	0	0	0	0	0	0	2998	0	0	24	0	0	0	26	0	0	0	0	0	2	0	0	0	557
		Sphedanolestes impressicollis	9302	0	0	0	0	0	0	2889	0	0	0	0	0	0	0	0	945	622	0	0	0	0	0	0	0	0	0	0	0	137
		Rhynocoris fuscipes	2760	0	0	0	0	0	0	9491	0	0	0	0	0	0	0	496	0	580	0	0	0	0	0	0	0	0	0	0	13	2
	Nabidae	Nabis sp.	0	6497	4	0	6739	0	0	0	7	10	0	0	0	0	0	126	5	0	0	0	0	0	0	0	0	42	0	0	0	0
		Nabis sinoferus	0	29	0	0	0	13217	1	0	0	0	0	0	0	0	0	57	0	0	0	0	0	0	0	0	0	7	0	0	0	4
		Stenonabis fujianus	31	0	18	0	2452	0	0	0	36	695	3667	0	161	3618	0	130	756	106	0	0	0	0	0	0	0	27	6	0	0	0
	Miridae	Deraeocoris sp.	47	0	0	0	0	4	12484	0	44	0	0	0	0	0	0	112	0	0	0	0	0	0	0	0	0	89	0	0	106	11
		Helopeltis sp.	0	3743	9982	0	0	0	0	0	0	7	0	0	0	0	0	78	0	0	0	0	0	0	0	0	0	16	0	0	0	0
		Adelphocoris lineolatus	9	119	13469	0	0	1	0	4	0	0	0	0	0	0	0	53	0	0	0	0	0	2	0	0	0	9	0	0	59	0
		Apolygus lucorum	0	0	0	0	3452	5254	0	0	58	0	0	0	0	0	0	63	731	405	0	0	0	41	0	3546	0	72	0	0	0	0
		Stenodema sp.	0	2603	0	0	8829	0	0	0	1510	0	0	0	0	0	0	30	0	19	0	0	0	0	0	0	0	58	0	0	0	0
Pentatomomorpha	Aradidae	Aradus hieroglyphicus	9	13092	0	0	0	0	0	0	0	0	0	0	0	0	0	9	0	0	0	0	0	0	0	0	0	1	0	0	0	0
		Neuroctenus taiwanicus	1	7884	4663	2	0	0	0	0	19	3	0	1	0	0	0	41	0	7	0	0	0	10	0	0	0	17	91	0	28	0
		Mezira yunnana	1	0	0	0	0	3	0	1	50	0	0	0	6	0	16	6076	0	22	0	0	0	3	0	0	0	117	0	0	28	675
	Pyrrhocoridae	Dindymus rubiginosus	533	1	0	1240	0	4	0	0	2962	0	0	0	854	0	0	0	4374	0	11	0	89	0	0	0	796	9	3	0	30	10
		Dysdercus cingulatus	34	0	0	11150	0	12	0	0	933	0	0	0	439	0	0	2	15	0	0	0	0	687	0	2	15	1	26	0	1018	11
		Dysdercus evanescens	10	0	16	4043	0	0	0	0	72	0	0	0	101	43	0	10	0	0	5448	0	0	3502	0	0	0	8	1486	0	40	1
		Pyrrhocoris tibialis	48	0	0	6628	0	3	0	0	3900	0	0	0	124	0	0	0	0	8	2	0	0	0	0	0	173	4	0	0	2	5

## Sheet: Top 49 genera
Infraorder	Family	Species	g__Enterococcus	g__Wolbachia	g__Rickettsia	g__Hungatella	g__Cedecea	g__Pantoea	g__Buchnera	g__Proteus	f__Enterobacteriaceae;__	o__Enterobacterales;__;__	g__Spiroplasma	f__Ruminococcaceae;g__uncultured	g__Yokenella	g__Asaia	g__Desulfovibrio	g__Sphingomonas	g__Lactococcus	g__Serratia	g__Commensalibacter	g__Arsenophonus	g__Dysgonomonas	f__Rhizobiaceae;__	g__Phaeovibrio	f__Erwiniaceae;__	g__Hafnia-Obesumbacterium	g__Acinetobacter	g__Citrobacter	g__Candidatus_Soleaferrea	g__Pseudomonas	g__Rhodococcus	g__Delftia	g__Lactobacillus	g__Clostridioides	g__Pectobacterium	g__Coriobacterium	f__Marinilabiliaceae;g__uncultured	g__Rs-K70_termite_group	g__Candidatus_Ishikawaella	g__Chryseobacterium	g__Sphingobacterium	g__Escherichia-Shigella	g__Staphylococcus	g__Tyzzerella	g__Allorhizobium-Neorhizobium-Pararhizobium-Rhizobium	o__Desulfobacterales;f__uncultured;g__uncultured	g__Flavobacterium	g__Muribaculaceae
Nepomorpha	Notonectidae	Anisops sp.	1138	0	0	0	0	0	0	0	576	101	0	0	0	0	48	0	46	1877	0	0	0	131	0	13	0	3	0	0	89	0	0	1199	0	0	0	0	0	0	0	56	118	2	0	47	0	7	348
		Enithares chinensis	104	9930	1	0	0	0	0	46	0	280	53	0	0	0	0	323	17	26	0	0	0	0	0	0	0	486	5	0	260	30	45	0	0	0	0	0	0	727	13	6	38	0	0	21	0	2	0
	Belostomatidae	Appasus japonicus	1	0	0	0	0	0	0	0	2	21	0	383	0	0	1415	4	1	2	0	1317	2063	0	82	0	0	0	0	1332	21	84	0	11	9	0	0	1855	364	0	2	0	0	0	556	0	1228	0	7
		Diplonychus rusticus	0	0	0	0	23	0	0	0	818	594	10	215	0	0	537	1	599	0	0	108	2016	0	3823	0	0	56	809	1001	22	82	2	0	1120	0	0	0	148	0	28	0	0	0	133	10	5	0	0
		Lethocerus deyrollei	3	0	0	0	0	126	0	17	125	6	1253	32	0	0	27	23	9	8	0	0	15	35	20	0	3	1693	243	2	314	324	15	1	0	0	0	0	2	0	174	1099	0	0	0	26	16	1080	0
	Nepidae	Ranatra chinensis	0	0	7	0	0	0	0	0	0	5561	210	1	0	4267	0	0	0	0	43	3171	0	0	0	0	0	0	0	0	2	0	0	0	0	0	0	1	0	0	0	0	1	0	0	0	0	0	0
		Ranatra lansburyi	1	2433	0	0	0	0	0	0	364	4225	46	2580	0	0	3198	0	0	4	0	0	1	0	0	0	0	2	0	0	0	0	0	2	0	0	0	0	467	0	0	0	0	0	0	0	0	0	0
		Laccotrephes robustus	2	0	0	0	0	0	0	0	10	135	3	7385	0	0	2520	0	0	192	0	0	298	0	0	0	0	0	17	0	0	0	0	0	3	0	0	0	763	0	0	0	0	0	656	0	0	0	0
Cimicomorpha	Reduviidae	Platymeris biguttatus	7054	0	0	0	0	0	0	3	0	0	5330	0	0	0	0	20	135	31	0	0	0	0	0	0	0	4	0	0	5	0	0	3	0	0	0	0	0	0	0	0	0	1054	0	0	0	1	0
		Sycanus croceovittatus	10411	0	0	0	0	0	0	0	234	0	0	0	0	0	0	0	0	310	0	0	0	0	0	0	2282	0	0	0	4	0	0	0	0	0	0	0	0	0	0	0	0	0	0	0	0	0	0
		Sycanus falleni	12981	0	0	0	0	0	0	1	88	0	0	0	0	0	0	0	0	65	0	0	0	0	0	0	0	0	0	0	7	194	0	31	0	0	0	0	0	0	0	0	0	0	0	0	0	0	0
		Sycanus szechuanus	6883	0	0	0	0	0	0	0	0	4	34	0	4472	0	0	0	0	2274	0	0	0	0	0	0	0	0	0	0	210	38	5	2	0	0	0	0	0	0	0	4	0	0	0	0	0	0	0
		Pahabengkakia piliceps	10766	0	0	0	0	0	0	0	0	0	0	0	2998	0	0	24	0	0	0	26	0	0	0	0	0	2	0	0	0	557	0	64	1	0	0	0	0	0	0	0	0	6	0	5	0	0	0
		Sphedanolestes impressicollis	9302	0	0	0	0	0	0	2889	0	0	0	0	0	0	0	0	945	622	0	0	0	0	0	0	0	0	0	0	0	137	0	0	0	0	0	0	0	0	0	0	0	0	0	0	0	0	0
		Rhynocoris fuscipes	2760	0	0	0	0	0	0	9491	0	0	0	0	0	0	0	496	0	580	0	0	0	0	0	0	0	0	0	0	13	2	2	0	0	0	0	0	0	0	210	64	0	0	0	81	0	10	0
	Nabidae	Nabis sp.	0	6497	4	0	6739	0	0	0	7	10	0	0	0	0	0	126	5	0	0	0	0	0	0	0	0	42	0	0	0	0	0	33	0	0	0	0	0	0	0	7	0	4	0	7	0	2	0
		Nabis sinoferus	0	29	0	0	0	13217	1	0	0	0	0	0	0	0	0	57	0	0	0	0	0	0	0	0	0	7	0	0	0	4	3	0	0	0	0	0	4	0	0	0	0	0	0	26	0	0	2
		Stenonabis fujianus	31	0	18	0	2452	0	0	0	36	695	3667	0	161	3618	0	130	756	106	0	0	0	0	0	0	0	27	6	0	0	0	0	0	0	1964	0	0	0	0	0	1	0	11	0	0	0	0	0
	Miridae	Deraeocoris sp.	47	0	0	0	0	4	12484	0	44	0	0	0	0	0	0	112	0	0	0	0	0	0	0	0	0	89	0	0	106	11	38	92	0	0	0	0	0	0	8	8	32	13	0	7	0	18	111
		Helopeltis sp.	0	3743	9982	0	0	0	0	0	0	7	0	0	0	0	0	78	0	0	0	0	0	0	0	0	0	16	0	0	0	0	0	0	0	0	0	0	0	0	2	4	0	3	0	2	0	0	0
		Adelphocoris lineolatus	9	119	13469	0	0	1	0	4	0	0	0	0	0	0	0	53	0	0	0	0	0	2	0	0	0	9	0	0	59	0	4	0	0	0	0	0	0	30	3	0	5	0	0	0	0	3	0
		Apolygus lucorum	0	0	0	0	3452	5254	0	0	58	0	0	0	0	0	0	63	731	405	0	0	0	41	0	3546	0	72	0	0	0	0	11	0	0	0	0	0	0	0	0	3	0	12	0	9	0	0	0
		Stenodema sp.	0	2603	0	0	8829	0	0	0	1510	0	0	0	0	0	0	30	0	19	0	0	0	0	0	0	0	58	0	0	0	0	156	0	0	0	0	0	0	0	0	0	26	194	0	0	0	0	0
Pentatomomorpha	Aradidae	Aradus hieroglyphicus	9	13092	0	0	0	0	0	0	0	0	0	0	0	0	0	9	0	0	0	0	0	0	0	0	0	1	0	0	0	0	1	0	0	0	0	0	0	0	26	0	0	0	0	0	0	0	0
		Neuroctenus taiwanicus	1	7884	4663	2	0	0	0	0	19	3	0	1	0	0	0	41	0	7	0	0	0	10	0	0	0	17	91	0	28	0	12	0	0	0	0	0	0	0	3	0	10	6	0	1	0	0	0
		Mezira yunnana	1	0	0	0	0	3	0	1	50	0	0	0	6	0	16	6076	0	22	0	0	0	3	0	0	0	117	0	0	28	675	54	95	0	0	0	0	0	0	4	64	1132	8	0	1003	0	0	26
	Pyrrhocoridae	Dindymus rubiginosus	533	1	0	1240	0	4	0	0	2962	0	0	0	854	0	0	0	4374	0	11	0	89	0	0	0	796	9	3	0	30	10	0	354	449	0	0	0	0	0	5	0	2	0	0	0	0	1	0
		Dysdercus cingulatus	34	0	0	11150	0	12	0	0	933	0	0	0	439	0	0	2	15	0	0	0	0	687	0	2	15	1	26	0	1018	11	0	0	0	0	93	0	0	0	0	2	0	0	0	0	0	0	0
		Dysdercus evanescens	10	0	16	4043	0	0	0	0	72	0	0	0	101	43	0	10	0	0	5448	0	0	3502	0	0	0	8	1486	0	40	1	21	0	1	0	364	0	0	30	3	0	18	0	0	0	0	0	0
		Pyrrhocoris tibialis	48	0	0	6628	0	3	0	0	3900	0	0	0	124	0	0	0	0	8	2	0	0	0	0	0	173	4	0	0	2	5	0	2	466	0	1495	0	0	0	0	0	4	0	0	3	0	0	1
[truncated: 2 more columns]
