# Supplementary material for: The Impact of Environmental Habitats and Diets on the Gut Microbiota Diversity of True Bugs (Hemiptera: Heteroptera)
Source: Biology (Basel). 2022 Jul 11;11(7):1039. doi: 10.3390/biology11071039 (PMC9312191; doi:10.3390/biology11071039)
Supplement: Supplementary file 1 [file biology-11-01039-s001.zip › Supplementary Table S5. The detail of standard curve and Cq values for each gut..xlsx]

## Sheet: Table S5
Table S5. The detail of standard curve and Cq values for each gut.
Species	Cq values	Average number of copies per gut	Standard Deviation
Anisops sp.	25.6843	45111.4	9218.32
Enithares chinensis	25.1501	89815.1	22352.5
Appasus japonicus	18.3497	2.00354e+08	2.45862e+07
Diplonychus rusticus	18.068	2.45574e+07	1.28929e+06
Lethocerus deyrollei	22.0587	1.2923e+06	87577.5
Ranatra chinensis	17.0795	6.79774e+07	5.1086e+06
Ranatra lansburyi	16.7928	5.18658e+07	1.45999e+07
Laccotrephes_robustus	18.4717	2.48699e+09	6.26607e+08
Platymeris biguttatus	22.6393	1.16978e+08	4.27877e+07
Sycanus croceovittatus	16.3568	2.32149e+09	2.34682e+08
Sycanus falleni	18.271	2.13918e+07	4.27761e+06
Sycanus szechuanus	16.434	8.30458e+07	1.66091e+07
Pahabengkakia piliceps	20.1723	3.46156e+06	48308
Sphedanolestes impressicollis	10.7401	7.46899e+09	1.83592e+09
Rhynocoris fuscipes	17.3145	5.70732e+07	2.15962e+06
Nabis sp.	21.9071	2.89316e+06	241500
Nabis sinoferus	20.9696	1.94087e+06	322051
Stenonabis fujianus	22.1635	1.63107e+06	433309
Deraeocoris sp.	21.1575	5.03124e+06	443642
Helopeltis sp.	20.5775	7.73227e+06	842675
Adelphocoris lineolatus	20.9257	2.01842e+06	428605
Apolygus lucorum	21.8144	783021	151185
Stenodema sp.	24.6054	157629	3672.03
Aradus hieroglyphicus	22.6511	334277	30647.5
Mezira yunnana	26.49	26251.6	11045.2
Dindymus rubiginosus	11.49	3.19453e+09	6.82951e+08
Dysdercus cingulatus	17.5038	7.45371e+07	5.26167e+06
Dysdercus evanescens	17.7882	4.02315e+07	1.33903e+06
Pyrrhocoris tibialis	15.0039	1.17961e+08	9.41432e+06

## Sheet: Standard curve
plasmid DNA concentration（ng/μl）	copies per μl	logarithmic value	Cq values
4.05	905493306	8.95689	10.3419
0.405	9.05493e+07	7.95689	13.3443
0.0405	9.05493e+06	6.95689	17.4122
0.00405	905493	5.95689	20.4188
0.000405	90549.3	4.95689	24.1313
4.05e-05	9054.93	3.95689	25.8622
4.05e-06	905.493	2.95689	28.877
